# Supplementary material for: Differential Fluorescent Chemosensing of Antibiotics Using a Luminescent Zn(II) Coordination Polymer Based on a 4-Amino-1,8-naphthalimide Tröger’s Base Fluorophore
Source: MDPI journal article supplement (doi:10.3390/chemistry6010011), 2024-02-07
Supplement: s1 [file s1]

## Supporting Information

### Differential Fluorescent Chemosensing of Antibiotics Using A Luminescent Zn(II)-Coordination Polymer Based on 4-Amino-1,8-Naphthalimide Tröger's base Fluorophore

Purti Patel,<sup>#</sup> Mannanthara Kunhumon Noushija,<sup>#</sup> and Sankarasekaran Shanmugaraju\*

Department of Chemistry, Indian Institute of Technology Palakkad, Palakkad-678557, Kerala, India. Email: shanmugam@iitpkd.ac.in

<sup>#</sup> = These authors contributed equally.

---

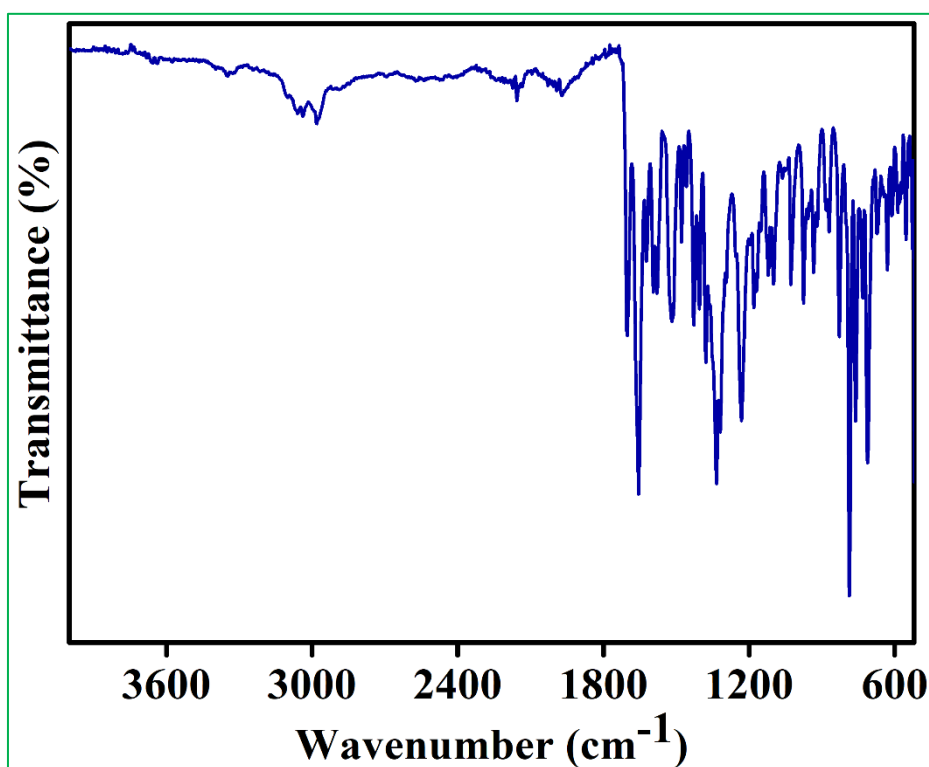

**Figure S1.** The FTIR spectrum of ligand TBNap.

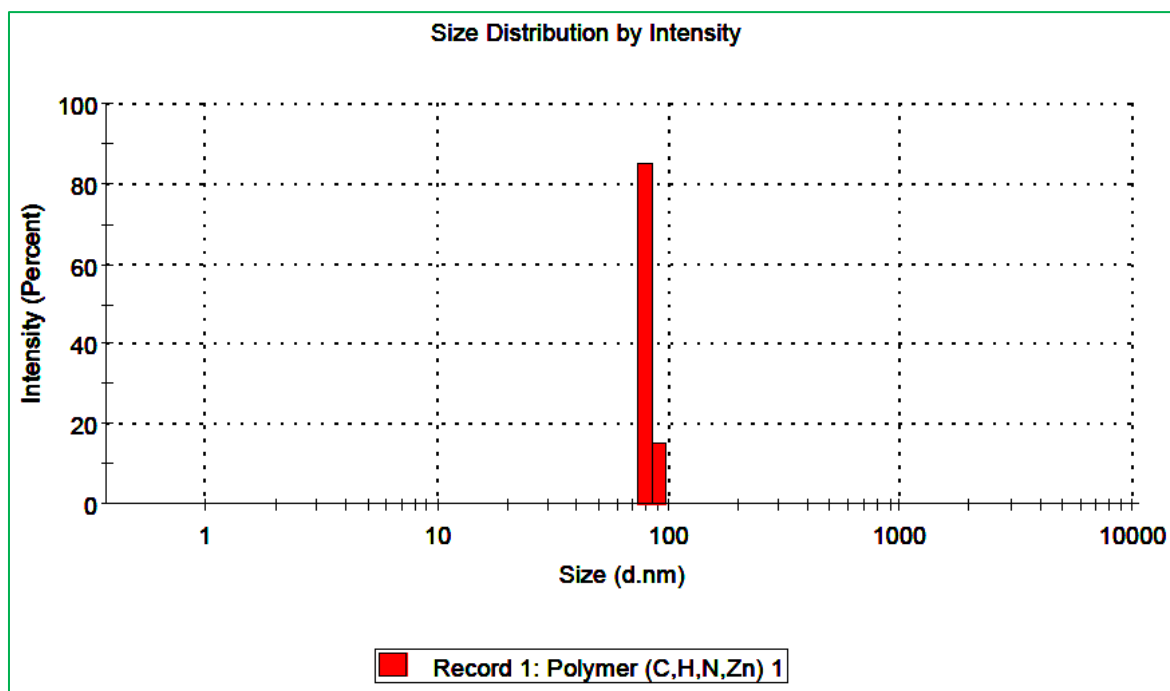

**Figure S2.** The particle size distribution data was obtained by DLS measurement for the polymer **TB-Zn-CP** in an aqueous medium.

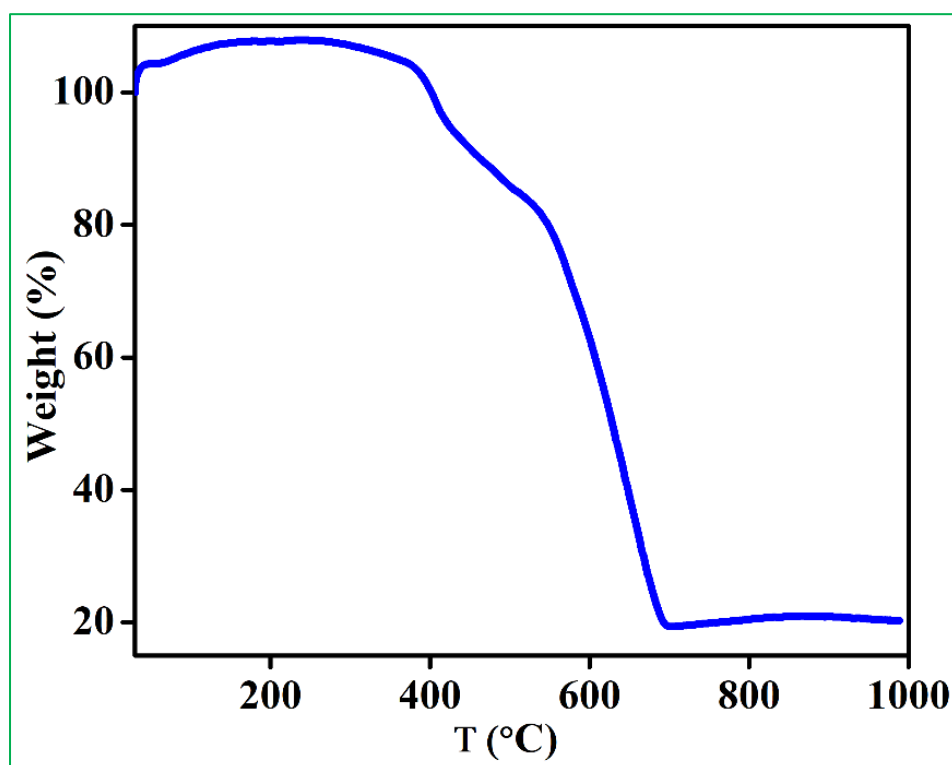

**Figure S3.** Thermogravimetric analysis (TGA) spectrum of **TB-Zn-CP**.

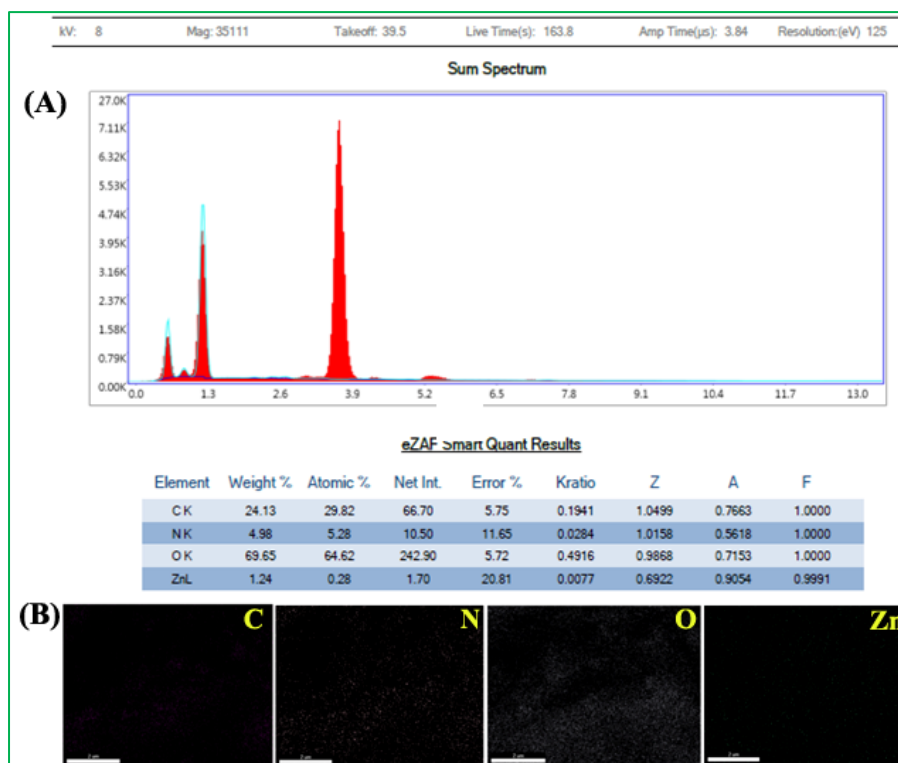

**Figure S4** (A) Energy dispersive X-ray spectroscopy (EDX) data and (B) Quanta mapping images for **TB-Zn-CP**.

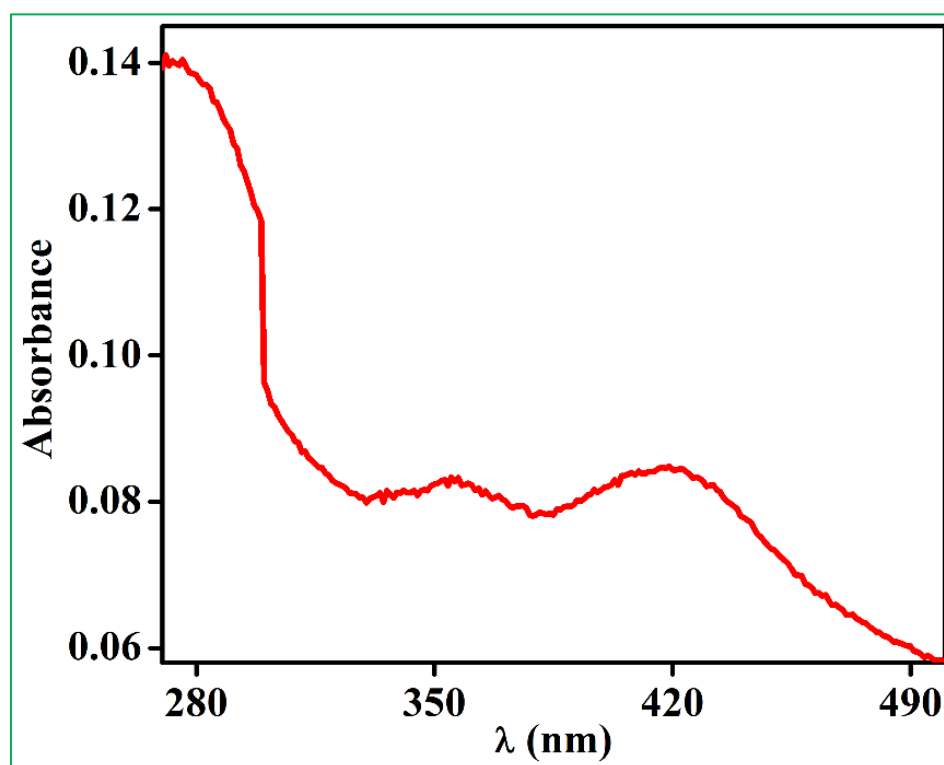

**Figure S5** UV-visible absorption spectrum of **TB-Zn-CP** measured in water.

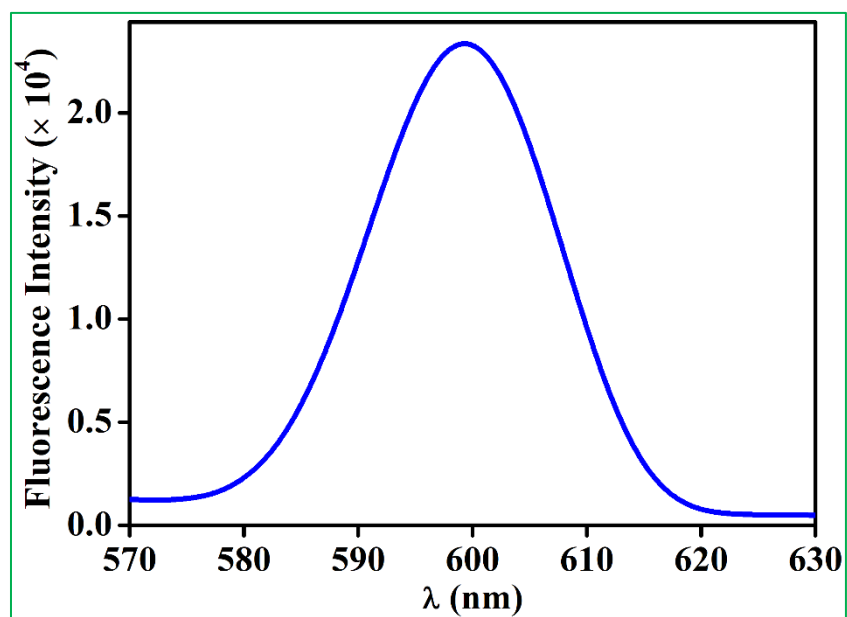

**Figure S6.** The fluorescence emission spectrum of **TB-Zn-CP** was recorded in water.
